# Supplementary material
Source: PubMed Central journal article supplement (PMC3769938)
Supplement: NIHMS501205-supplement-supplement_1.pdf [file NIHMS501205-supplement-supplement_1.pdf]

## Materials and Methods

### Preparation of $\mu$ -ILEDs

The fabrication began with epitaxially grown GaN on a sapphire wafer (500  $\mu\text{m}$  thick double polished sapphire with 2" diameter, Cermet Inc.). The GaN stack layers consisted of undoped GaN (3.8  $\mu\text{m}$ ), n-type GaN (2  $\mu\text{m}$ ), spacer (0.4  $\mu\text{m}$ ), MQW (0.14  $\mu\text{m}$ ), and p-type GaN (0.2  $\mu\text{m}$ ). Residual metal ions and GaN oxide on the surface were removed by rinsing with diluted HCl (33 %). L-shaped current spreading layers of Ni (15 nm) and Au (15 nm) were formed by sputter deposition (AJA ATC 2000), followed by annealing at 500  $^{\circ}\text{C}$  for 5 min in an oxygen and nitrogen atmosphere to form an ohmic contact. After exposing n-type regions defined using photolithography (40 x 40  $\mu\text{m}^2$  recessive square with thick AZ 2035, Microchem Inc) and etched using chlorine based-inductively coupled plasma reactive ion etching (ICP RIE, Plasmatherm, SLR-770), both n- and p- contact pads, each 25 x25  $\mu\text{m}^2$  in dimension, of 15 nm of Cr and 300 nm of Au were deposited by electron beam evaporation (Temescal, FC-1800). To define the lateral dimensions of the devices (100x100  $\mu\text{m}^2$ ), chlorine based ICP RIE was used to remove GaN down to the sapphire substrate, with negative tone photoresist as an etching mask (AZ 2070, Microchem Inc).

After deposition of a passivation layer of  $\text{SiN}_x$  (200 nm) by plasma enhanced chemical vapor deposition (PECVD; STS, Mesc Multiple) the processed substrate was bonded to a silicon wafer using a layer of palladium (Pd)-indium (In) chemical alloy, followed by laser lift off (KrF, intensity,  $\sim 0.9 \text{ J/cm}^2$ ) to remove the sapphire from the  $\mu$ -ILEDs. Here, the laser light triggered thermal decomposition at the GaN-sapphire interface, allowing easy mechanical removal of sapphire substrate upon heating to 70  $^{\circ}\text{C}$  on a hotplate. Wet etching with 5 wt% diluted HCl selectively removed the underlying unalloyed In layer, leaving residual porous structures of In-Pd alloy that served as anchors to tether the  $\mu$ -ILEDs to the silicon wafer. In this configuration, the devices were easily lifted onto the surfaces of microstructured (3  $\mu\text{m}$  in diameter, 1.2  $\mu\text{m}$  in height, and 5  $\mu\text{m}$  in space) slabs of poly(dimethylsiloxane) (PDMS; Sylgard 184, Dow Corning) via the action of van der Waals forces. Etching the exposed unalloyed Pd and passivation layer ( $\text{SiN}_x$ ) removed all of residual metal on the  $\mu$ -ILEDs. The result was an array of  $\mu$ -ILEDs on microstructured PDMS, suitable for manipulation by transfer printing, for integration onto microneedles.

### Fabrication of releasable, injection microneedles

To fabricate penetrating polymeric microneedles, suitable shapes were first defined in layers of Cr (15 nm) and Au (300 nm) deposited on a glass slide (5 x 3.5  $\text{cm}^2$ ) by photolithography and wet etching. Photo-curable epoxy (SU-8 100, Microchem Inc) was then spin cast (1100 rpm for 250  $\mu\text{m}$  and 1800 rpm for 150  $\mu\text{m}$  thickness) on the slide, and ultraviolet light was passed (380  $\text{mJ/cm}^2$ ) through the backside to define a pattern of exposure in the epoxy, with the geometry of the microneedle. Developing away the unexposed regions followed by thermal annealing (150  $^{\circ}\text{C}$  for 10 min) defined and fully cured the epoxy to complete the fabrication of microneedles, typically in array geometries. Poor adhesion between the glass and the epoxy allowed easy mechanical removal of the microneedles, with tweezers, stamps or other implements. The left image

of Fig S5 shows an array of epoxy microneedles on glass. The left and right three microneedles were removed before this image was collected.

To fabricate 6  $\mu\text{m}$  thick (or 2.5  $\mu\text{m}$  thick for  $\mu\text{-ILED}$ ) polyester device substrates (Mylar<sup>®</sup> film, Chemplex<sup>®</sup> industries) with similar microneedle layouts, the films were first laminated on a PDMS coated substrate. Patterns of Cr (100 nm thickness) in microneedle geometries were used as etching masks for oxygen plasma RIE (March polymer RIE) of the exposed regions of the films. Wet etching of the Cr completed the fabrication.

### Fabrication of sensors

For microelectrodes and temperature sensors, 6  $\mu\text{m}$  thick, patterned polyester films on PDMS coated glass, formed according to procedures described above, were used. To fabricate the electrophysiological sensor, 100  $\mu\text{m}$  wide and 100 nm thick lines of Pt were formed on the needle by photolithography and lift-off using negative tone resist (AZ 2070, Microchem Inc). To measure electrophysiological signals from a single nerve, an epoxy passivation layer (SU-8 2, Microchem Inc.) defined 20 x 20  $\mu\text{m}^2$  openings to the underlying Pt, as the sensing locations. For temperature sensors, 20 nm thick and 20  $\mu\text{m}$  wide Pt serpentine structures served as resistors, connected by Au electrodes at both ends. For the photodetectors, the top silicon layer of an silicon on insulator (SOI) wafer (1.25  $\mu\text{m}$  thick silicon on a 400 nm thick layer of silicon dioxide on a silicon substrate, Soitec) was p- and n- doped sequentially through masking layers of silicon dioxide (900-nm thick) deposited by plasma-enhanced chemical vapor deposition and patterned by photolithography and etching. For p-doping, the sample was exposed to a boron source for 30 min at 1000 °C in an N<sub>2</sub> environment. The n- doping used a phosphorous source under the same conditions for 10 min. A single cell had a size of 200  $\mu\text{m}$  x 200  $\mu\text{m}$  including p- and n- doped parts with 200  $\mu\text{m}$  x 40  $\mu\text{m}$  (active area: 200  $\mu\text{m}$  x 120  $\mu\text{m}$ ), isolated by reactive ion etching through the silicon layer in a geometry patterned by photolithography. The buried oxide layer of the SOI wafer was partially etched to slightly undercut silicon layer. Next, photolithography defined photoresist structures at the four corners of each square cell to hold the silicon layers to the underlying silicon wafer during complete removal of the silicon dioxide layer with HF.

### Measurements on $\mu\text{-IPD}$

The current responses of  $\mu\text{-IPDs}$  at different current injection levels (0 to 9 mA) into four blue  $\mu\text{-ILEDs}$ , in an array, were measured at biases of -5V to 5V. For time-dependent light response measurements, AC current with four different frequencies (i.e., 3, 5, 10, and 20 hz) were applied to the  $\mu\text{-ILEDs}$  using a pulse generator (Global Specialities<sup>®</sup>). The current response of the  $\mu\text{-IPDs}$  at a bias of -3V were measured for 8 s with a sampling rate of 160 Hz.

### Impedance measurements on microelectrode

Impedance was measured using a potentiostat (Gamry instruments, reference 600) with phosphate buffered saline (PBS, Sigma-Aldrich). The PBS solution was diluted in 1 liter deionized water for 0.01 M, pH 7.4 at 25 °C. To measure impedance, we applied frequency ranging from 11.0 KHz to 1 KHz.

### Fabrication of $\mu$ -ILED arrays and interconnects on microneedles

A PDMS stamp with posts ( $100 \times 100 \mu\text{m}$  and heights of  $100 \mu\text{m}$ ) was positioned above  $\mu$ -ILEDs on a structured PDMS slab and then used to remove an  $\mu$ -ILED, one at a time, for integration onto a thin UV curable adhesive coated on a  $2.5 \mu\text{m}$  thick microneedle shaped substrate (patterned polyester film on PDMS coated glass, fabricated using steps similar to those described above for the sensors). The printing was performed using a modified mask aligner (Karl Suss, MJB). To form interconnected arrays of  $\mu$ -ILEDs, the  $\text{SiN}_x$  passivation layer was first removed by reactive ion etching (RIE; Plasmatherm 790). Coating with an adhesion promoter (Dow, AP3000) and then a layer of photosensitive benzocyclobutene ( $6 \mu\text{m}$  thick; BCB) prepared the devices for backside exposure to ultraviolet light, through the transparent substrate. This light exposed the BCB in all regions except those above the opaque n-, and p- contact pads. Developing away the unexposed BCB (Advanced Developer, DS2100) and blowing with a stream of  $\text{N}_2$  removed the residual developer, to complete the patterning process for via holes. After fully curing the BCB in an Ar atmosphere in a glove box at  $210^\circ\text{C}$  for 3 hr, remaining BCB residues on the contacts were removed by oxygen RIE. To form metallization lines to the contacts, 15 nm of Cr and 300 nm of Au were sputter deposited, and then wet etched through a photopatterned layer of photoresist. Finally, an epoxy layer ( $2 \mu\text{m}$  thick, SU-8 2 Microchem) was spin cast and cured to form insulating coatings on the electrodes.

### Forming multi-functional $\mu$ -ILED systems on releasable injection microneedles

Separately fabricated thermal and electrophysiological sensors and printed  $\mu$ -ILEDs, each on polyester thin film substrates, were stacked in an aligned configuration on a penetrating epoxy microneedle substrate using a modified mask aligner (Karl Suss, MJB). A thin layer of UV curable epoxy (SU-8 2) served as an adhesive for bonding the sensors and the  $\mu$ -ILEDs. For bonding the entire stack to the penetrating microneedle, a thin layer of purified silk (7 wt%) was used, to allow release of after implantation. After curing or drying, the adhesives in all cases have thicknesses of a few hundred nanometers.

### Characterization of optical and thermal properties

Optical measurements of the emission spectra and light output were obtained with a spectrometer (HR4000 and FOIS-1 fiber optics integrating sphere, Ocean Optics). Thermal measurements were performed using a MWIR-based InDb thermal imager (InfraScope, GFI) with a base temperature of  $37^\circ\text{C}$ .

### Wired powering

$\mu$ -ILED devices were connected to a function generator (AMPI, Master-9 or Tektronix, AFG3022B) and TTL modulation (low 0V, high 4V) was used to power the  $\mu$ -ILEDs at the stated frequencies and pulse widths.

### Wireless powering and RF powering scavenger

The wireless power transmitter includes a low-frequency signal generator, an RF signal generator, a power supply, a RF power amplifier, and a panel antenna. The low-frequency signal generator outputs an amplitude modulation signal to modulate the RF

power generator. The RF power amplifier that is powered by the power supply enlarges the modulated RF signal from the RF signal generator. The RF power is then transmitted from the panel antenna on 75  $\mu\text{m}$  thick polyimide layer or commercialized PCB board.. The RF signal generator has a power output from -10 to -17 dBm at 910 MHz, which corresponds to a power ranging from 0.1 mW to 0.02 mW. The power amplifier has a gain of 49 dB, thus the power output from the power amplifier is from 1.6 to 7.9 W. Under an antenna gain of 13 dBi and at a distance that is approximately 1 meter away from the antenna, the RF power that reaches the mice is approximately 4 mW, given an exposure area of the mice of  $\sim 32 \text{ cm}^2$ . Mice with chronically implanted  $\mu$ -ILED devices were acutely connected to the headstage antenna immediately prior to any wireless photostimulation.

#### Numerical modeling of temperature in the $\mu$ -ILEDs

A three dimensional (3D) model was established to study the temperature distributions in the system in the pulsed mode and DC mode. Eight-node, hexahedral brick elements in the finite element software ABAQUS were used to discretize the geometry. The  $\mu$ -ILEDs are modeled as heat sources. The bottom surface of device was set as a constant temperature, while the other surfaces are free heat convection boundary with the convection heat transfer coefficient  $25 \text{ W}/(\text{m}^2 \cdot \text{K})$ . The initial temperature of the device was set as the environmental temperature  $T_\infty$ . The dimensions and layout of the device can be found in the main text. The microelectrodes and the sensors were neglected in the finite element simulations due to their small thickness ( $\sim 300 \text{ nm}$ ) compared to that of other layer ( $\sim 6 \mu\text{m}$ ). The thermal conductivity, density and thermal capacity are  $317 \text{ W}/(\text{m} \cdot \text{K})$ ,  $19300 \text{ kg}/\text{m}^3$  and  $130 \text{ J}/(\text{kg} \cdot \text{K})$  (*S1*) for Au,  $0.2 \text{ W}/(\text{m} \cdot \text{K})$ ,  $1190 \text{ kg}/\text{m}^3$  and  $1200 \text{ J}/(\text{kg} \cdot \text{K})$  for epoxy (*S2*),  $0.15 \text{ W}/(\text{m} \cdot \text{K})$ ,  $1050 \text{ kg}/\text{m}^3$  and  $1270 \text{ J}/(\text{kg} \cdot \text{K})$  for polyester (*S3*, *S4*),  $230 \text{ W}/(\text{m} \cdot \text{K})$ ,  $2330 \text{ kg}/\text{m}^3$  and  $700 \text{ J}/(\text{kg} \cdot \text{K})$  for  $\mu$ -ILEDs (*S6*), and  $0.29 \text{ W}/(\text{m} \cdot \text{K})$ ,  $1050 \text{ kg}/\text{m}^3$  and  $2180 \text{ J}/(\text{kg} \cdot \text{K})$  for BCB (*S7*).

Figure S16 (A) shows the time-average temperature of  $\mu$ -ILEDs operated in pulsed modes (3, 10, and 20 Hz) and DC mode at 5, 10, 15 and 20 mW input power when the background temperature is  $T_\infty = 37 \text{ }^\circ\text{C}$ . The finite element results (line) agree well with the experimental measurements (dot). Figure S16 (B) and (C) show the surface temperature distribution from experiments and finite element simulations. They agree reasonably well with each other and the discrepancy is due to the assumption of heat source only for  $\mu$ -ILEDs since other parts (e.g., Au interconnect) may also serve as heat sources.

#### Analytical modeling of temperature in the tissue

An analytical model was established to obtain the steady temperature in the tissue when the device is inserted into the mouse brain tissue. The  $\mu$ -ILED is modeled as a disk heat source with a radius  $r_0 = L/\sqrt{\pi}$  corresponding to the same area of  $\mu$ -ILED ( $L \times L$ ) and a heat generation of  $Q(t)$ . Since the thickness of tissue ( $\sim 4 \text{ mm}$ ) is much larger than that of device ( $\sim 100 \mu\text{m}$ ), we ignore the device structure in the analytical modeling. Once we have the temperature due to a single  $\mu$ -ILED, the temperature due to four  $\mu$ -ILEDs can be obtained by the superposition theorem.

The heat transfer equation in cylindrical coordinate with the origin as the center of  $\mu$ -ILED is

$$\frac{\partial^2 T}{\partial r^2} + \frac{1}{r} \frac{\partial T}{\partial r} + \frac{\partial^2 T}{\partial z^2} - \frac{c\rho}{k} \frac{\partial T}{\partial t} = 0 \quad (1)$$

where  $k$  is thermal conductivity of tissue,  $\rho$  is density of tissue,  $c$  is specific heat capacity of tissue. The thermal diffusivity of tissue is  $\alpha = k/(c\rho)$ . By setting  $\theta = T - T_\infty$ , where  $T_\infty$  is the remote temperature, the above equation becomes

$$\frac{\partial^2 \theta}{\partial r^2} + \frac{1}{r} \frac{\partial \theta}{\partial r} + \frac{\partial^2 \theta}{\partial z^2} = \alpha \frac{\partial \theta}{\partial t} \quad (2)$$

Boundary conditions involve the adiabatic condition on the top surface ( $z=-h_0$ ) and a constant temperature  $T_\infty = 37^\circ\text{C}$  on the bottom surface ( $z=h_1$ ). At the  $\mu$ -ILED interface ( $z=0$ ), discontinuous heat flow  $Q(t)$  is assumed as a means to introduce the input pulsed power. Let's consider a unit pulsed power  $P(t)$  for time between 0 and  $t_0$  with a period  $T$ , which can be expanded into Fourier Series

$$P(t) = \begin{cases} 1 & 0 < t \leq t_0 \\ 0 & t_0 < t \leq T \end{cases} = a_0 + \sum_{n=1}^{\infty} a_n \cos n\omega t + \sum_{n=1}^{\infty} b_n \sin n\omega t \quad (3)$$

where  $\omega = 2\pi/T$ ,  $a_0 = t_0/T$ ,  $a_n = 2 \sin(n\omega t_0)/(n\omega T)$ ,  $b_n = 2[1 - \cos(n\omega t_0)]/(n\omega T)$ . For each  $\cos(n\omega t)$  [or  $\sin(n\omega t)$ ] in the power expression of Eq. (3), we can assume the solution of Eq. (2) to be  $\theta(r, z, t) = \psi(r, z) \exp(n\omega t)$ . Equation (2) then becomes

$$\frac{\partial^2 \psi}{\partial r^2} + \frac{1}{r} \frac{\partial \psi}{\partial r} + \frac{\partial^2 \psi}{\partial z^2} - q^2 \psi = 0 \quad (4)$$

where  $q^2 = \frac{n\omega i}{\alpha}$ . Equation (4) can be solved by applying the Hankel transformation.

For  $-h_0 \leq z \leq 0$ , we obtain the solution as

$$\psi(r, z; n\omega) = \int_0^{+\infty} A_0 \left[ \exp(z\sqrt{s^2 + q^2}) + \exp(-z\sqrt{s^2 + q^2} - 2h_0\sqrt{s^2 + q^2}) \right] J_0(sr) s ds, \quad (5)$$

$$\text{where } A_0 = \frac{r_0 J_1(sr_0)}{2k_s s \sqrt{s^2 + q^2}} \frac{1 - \exp(-2h_1\sqrt{s^2 + q^2})}{1 + \exp(-2h_0\sqrt{s^2 + q^2} - 2h_1\sqrt{s^2 + q^2})}.$$

The temperature increase due to the power of  $\cos(n\omega t)$  [or  $\sin(n\omega t)$ ] is then equal to  $|\psi(r, z; n\omega)| \cos(n\omega t + \beta_n)$  [or  $|\psi(r, z; n\omega)| \sin(n\omega t + \beta_n)$ ] where  $\tan(\beta_n) = \text{Im}(\psi)/\text{Re}(\psi)$ .

The temperature due to the power  $P(t)$  in Eq. (3) is given by

$$\psi(r, z, t) = a_0 \psi(r, z; 0) + \sum_{n=1}^{\infty} a_n |\psi(r, z; n\omega)| \cos(n\omega t + \beta_n) + \sum_{n=1}^{\infty} b_n |\psi(r, z; n\omega)| \sin(n\omega t + \beta_n) \quad (6)$$

The temperature due to the four  $\mu$ -ILEDs with total power  $Q(t) = Q_0 * P(t)/4$  can then be given by

$$\psi_{tot}(r, z, t) = \frac{Q_0}{4} \sum_{i=1}^4 \psi_i(r, z, t) \quad (7)$$

In vitro experiments, the thermal conductivity  $k$  of the tissue is 0.6 W/(m·K), the density  $\rho$  is 1040 Kg/m<sup>3</sup>, the specific heat  $c$  is 3650 J/(kg·K)(S8). The predicted surface temperature ( $z=-h_0$ ) agrees well with experimental measurement as shown in Fig. S17, and Fig. 2(D) and (E). In vivo experiments, there is a heat loss due to blood flow and we fit an effective power to be 0.62 mW at 3Hz. Then the predicted the time-averaged temperature at the location of temperature sensor ( $z=-6 \mu\text{m}$ ) agrees very well with that in experiments at other frequencies with ~5% error. To further verify the analytical solution in Eq. (7), a full 3D finite element model for the device/tissue system is also established. The time history of average temperature in Fig. 2(F) shows a good agreement between finite element simulation and experimental measurement.

#### Preparation of phantom skin and IR measurement of RF scavenger

The potential localized heating effect of RF power is characterized using a phantom skin sample that is placed in the RF field. The phantom skin (S9, S10) is a gelatin-based material that is made of the combination of water, agar, polyethylene, sodium chloride, sodium azide (Sigma-Aldrich Co.), and TX 151 (Oil Center Research), and has similar electrical properties as animal skin at the RF range. The thermal imaging is taken using an infrared camera (A655sc, FLIR Systems, Inc.), which has high resolution and a measurement accuracy at  $\pm 2\%$  of the reading value.

#### Experimental subjects

Adult (25–35 g) male C57BL/6J and TH::IRES-Cre backcrossed to C57BL/6J mice were group-housed, given access to food pellets and water *ad libitum* (except where noted) and maintained on a 12 h:12 h light:dark cycle (lights on at 7:00 AM). All animals were held in a facility in the lab 1 week prior to surgery, post-surgery and throughout the duration of the behavioral assays to minimize stress from transportation and disruption from foot traffic. All procedures were approved by the Animal Care and Use Committee of Washington University and conformed to US National Institutes of Health guidelines.

### Viral preparation

Plasmids coding pAAV-EF1a-DIO-EFYP, pAAV-EF1a-double floxed-hChR2(H134R)-EYFP-WPRE-HGHpA, and pLenti-EF1a-hChR2(H134R)-EYFP-WPRE were obtained from Addgene (Addgene.org) originally from the Deisseroth Laboratory at Stanford University. The DNA was amplified with a Maxiprep kit (Promega) and packaged into AAV5 serotyped viruses by the WUSTL Hope Center Viral Core. LV-PGK-GFP was provided by the WUSTL viral core facility. The final viral concentration was  $2-5 \times 10^{12}$  genome vg/mL for the adeno-associated viruses and  $1.1-1.3 \times 10^8$  IU/ml for all the lentivirus used.

| <b>Plasmid</b>                                       | <b>Source</b>                    | <b>Packaged by</b>           | <b>Serotype</b> | <b>Titer</b>             |
|------------------------------------------------------|----------------------------------|------------------------------|-----------------|--------------------------|
| pAAV-EF1a-DIO-EFYP                                   | Deisseroth Laboratory (Stanford) | WUSTL Hope Center Viral Core | AAV5            | $5 \times 10^{12}$ vg/ml |
| pAAV-EF1a-double floxed-hChR2(H134R)-EYFP-WPRE-HGHpA | Deisseroth Laboratory (Stanford) | WUSTL Hope Center Viral Core | AAV5            | $2 \times 10^{13}$ vg/ml |
| pLenti-EF1a-hChR2(H134R)-EYFP-WPRE                   | Deisseroth Laboratory (Stanford) | WUSTL Hope Center Viral Core | N/A             | $1.1 \times 10^8$ IU/ml  |
| pRRLsinPGK-GFPppt                                    | Sands Laboratory (WUSTL)         | WUSTL Hope Center Viral Core | N/A             | $1.3 \times 10^8$ IU/ml  |

### Stereotaxic surgery

After the animals were acclimatized to the holding facility for seven to nine days, they were anaesthetized in an induction chamber (4% Isoflurane) and placed in a stereotaxic frame (Kopf Instruments, Model 1900) where they were maintained at 1-2% isoflurane. A craniotomy was performed and mice were injected with 1ul of AAV5-DIO-ChR2 or AAV5-DIO-eYFP, LV-Ef1 $\alpha$ -ChR2-eYFP, or LV-Ef1 $\alpha$ -GFP unilaterally into the VTA (stereotaxic coordinates from bregma: -3.20 anterior-posterior (AP), +/-0.50 medial-lateral (ML), -4.90 mm dorsal-ventral (DV)), LC (-5.45 AP, +/- 1.25 ML, -4.00 DV), or the ventral striatum (1.3 AP, +/- 1.0 ML, -4.00 DV). Mice were then implanted with metal cannula (PlasticsOne; coordinates adjusted from viral injection 0.00 AP, +/- 0.25 ML, +1.00 DV), fiber optic implants (coordinates adjusted from viral injection 0.00 AP, +/- 0.25 ML, +1.00 DV)(*S11*), or a  $\mu$ -ILED device (same coordinates as viral injection). Custom adapters (WUSTL Instrument Machine Shop) for the Kopf cannula holder (Model 1966) were used to implant the fiber optics and the  $\mu$ -ILED devices. For biodissolvable samples, the device was implanted at the desired target, ACSF was applied to the portion of the device that remained outside of the skull to facilitate dissolution of the adhesive, and then the epoxy needle was removed after a delay of 15 minutes. The implants were secured using two bone screws (CMA, 743102) and affixed with TitanBond (Horizon Dental Products) and dental cement (Lang Dental). Mice were

allowed to recover for 3-5 weeks prior to behavioral testing; this interval also permitted optimal AAV expression and Cre recombinase activity.

### Immunohistochemistry

Immunohistochemistry was performed as described (S12) Briefly, mice were anesthetized with pentobarbital and intracardially perfused with ice-cold 4% paraformaldehyde in phosphate buffer (PB). Brains were dissected, post-fixed for 24 hr at 4 °C and cryoprotected with solution of 30% sucrose in 0.1M PB at 4°C for at least 24 hr, cut into 30 µm sections and processed for immunostaining. 30 µm brain sections were washed three times in PBS and blocked in PBS containing 0.5% Triton X-100 and 5 % normal goat serum. Sections were then incubated for ~16 hr at room temperature in rabbit anti c-fos antibody (1:20000, Millipore), guinea pig anti-GFAP (1:500, Synaptic Systems), rabbit anti-Iba1 (1:300, Wako Chemicals) and/or chicken anti-TH (1:2000, Aves Labs). Following incubation, sections were washed three times in PBS and then incubated for 2 hr at room temperature in Alexa Fluor 488 goat anti-mouse IgG (1:500, Invitrogen), Alexa Fluor 594 goat anti-rabbit IgG (1:500, Invitrogen-), goat anti-chicken Alexa Fluor 633(1:500, Invitrogen) and/or goat anti-guinea pig Alexa Fluor 546(1:500, Invitrogen) were then washed three times in PBS and followed by three 10-min rinses in PB and mounted on glass slides with Vectashield (Vector Labs) and sealed with nail polish for microscopy. All sections were imaged on both epifluorescent (Olympus BX61) and confocal (Olympus Fluoview 500) microscopes. Gain and exposure time were constant throughout, and all image groups were processed in parallel using Adobe Photoshop CS5 (Adobe Systems).

| <b>Antibody</b>                     | <b>Species</b> | <b>Dilution</b> | <b>Source</b>    |
|-------------------------------------|----------------|-----------------|------------------|
| GFAP                                | Guinea Pig     | 1:500           | Synaptic Systems |
| Iba1                                | Rabbit         | 1:300           | Wako Chemicals   |
| TH                                  | Chicken        | 1:2000          | Aves Labs        |
| c-fos                               | Rabbit         | 1:20,000        | Millipore        |
| Alexa Fluor 488 anti-mouse IgG      | Goat           | 1:500           | Invitrogen       |
| Alexa Fluor 594 anti-rabbit IgG     | Goat           | 1:500           | Invitrogen       |
| Alexa Fluor 633 anti-chicken IgG    | Goat           | 1:500           | Invitrogen       |
| Alexa Fluor 546 anti-guinea pig IgG | Goat           | 1:500           | Invitrogen       |
| Alexa Fluor 594 anti-chicken IgG    | Goat           | 1:500           | Invitrogen       |

### Cell culture and transfection of NOPR-YFP expressing, HEK293 Cells

A single 50 x 50 x 6.45 µm µ-ILED was printed onto a standard glass coverslip (Fisherbrand, 12-545-80). The glass was coated with Poly-L-lysine (Sigma-Aldrich, P4707) to facilitate cell adhesion. Stable HEK293 cells expressing pcDNA3 containing nociceptin opioid peptide receptor-YFP (NOPR-YFP) were generated as previously described (S13). The NOPR-YFP expressing cells were grown on the coverslip in a 24-



well plate and placed in a 37 °C 5% CO<sub>2</sub> incubator. Cells were washed three times with PBS and then fixed in 4% paraformaldehyde for 20 min, washed in PBS, washed in 0.1 M PB, and mounted using VECTASHIELD (Vector Laboratories) and sealed with clear nail polish. Images were captured using Metamorph 7.6 (Molecular Devices) and processed with ImageJ 1.44o (NIH).

#### cAMP Assay

HEK293 cells were co-transfected with Optoβ<sub>2</sub> (*S14* and pGloSensor-22F cAMP plasmid (Promega E2301) in 96-well format. Using a SynergyMx microplate reader (BioTek; VT, USA), baseline luminescence recordings were taken. In the presence of 9-cis retinal (1 μM), cells were exposed to μ-ILED light (450 nm, 5 sec, 0.5 W/cm<sup>2</sup> pulse) and relative luminescent units taken every 2 sec using GloSensor cAMP Assay (Promega). Relative luminescent units were normalized to an initial 1 min recording of baseline. Data are expressed as ± S.E.M.

#### Immunoblotting

Western blots for phospho-MAPKs were performed as described previously (*S13*). Briefly, Optoβ<sub>2</sub> expressing HEK293 cells were serum-starved 4-6 h prior to treatment. Cells were light treated (450 nm, 1 min, 0.5 W/cm<sup>2</sup> pulse), lysed in 70 μl of lysis buffer (50 mM Tris-HCl, 300 mM NaCl, 1 mM EDTA, 1 mM Na<sub>3</sub>VO<sub>4</sub>, 1 mM NaF, 10% glycerol, 1% Nonidet P-40, 1:100 of phosphatase inhibitor mixture set 1 (Calbiochem), and 1:100 of protease inhibitor mixture set 1 (Calbiochem)), sonicated for 20 s, centrifuged for 15 min (14000 x g, 4 °C). 50 μg of total protein was loaded onto non-denaturing 10% bisacrylamide precast gels (Invitrogen) and run at 150 V for 1.5 h. Blots were transferred to nitrocellulose (Whatman, Middlesex, UK) for 1.5 h at 30 mV, blocked in TBS/5% bovine serum albumin for 1 hr, incubated overnight at 4 °C with a 1:1000 dilution of goat-anti- rabbit phospho-ERK 1/2 (Thr-202/Tyr-204) antibody (Cell Signaling) and mouse actin (1:20,000, AbCam). Following overnight incubation, membranes were washed 4 x 15 min in TBST (Tris- buffered saline, 1% Tween 20) and then incubated with IRDye 800- and 700 conjugated affinity-purified anti-rabbit or anti-mouse IgG at a dilution of 1:5000 (pERK) or 1:20,000 (actin) in a 1:1 mixture of 5% milk/TBS and Li-Cor blocking buffer (Li-Cor Biosciences, Lincoln, NE) for 1 h at room temperature, washed 3 x 10 min in TBST, 1 x 10 min in TBS and analyzed using the Odyssey infrared imaging system (Li-Cor Biosciences). Band intensity was measured using Odyssey software following background subtraction and integrated band density in high-resolution pixels calculated. All subtypes of ERK (1 and 2) were quantified together. All pERK bands were normalized to actin, as an equal protein loading control and plotted using GraphPad (GraphPad Prism 5.0) software. Statistical significance was taken as \* p < 0.05 as determined by unpaired two-tailed t-test.

#### In vivo electrophysiology

To demonstrate the ability of the incorporated electrode, spontaneous cellular activity was monitored in the deep midbrain (Fig. 2H). For light modulated responses, an array of 16 (35-μm tungsten wires, 150-μm spacing between wires, 150-μm spacing between rows,

Innovative Physiology) was epoxied to a rigid  $\mu$ -ILED device and lowered into the VTA of a lightly (~1% isoflurane) anesthetized, TH-Cre mouse expressing ChR2(H134)-eYFP in the VTA (fig. S15). Two skull screws were arbitrarily placed anterior to bregma on either side of the midline and used to ground the electrode array. In either approach, voltage readings from each electrode were bandpass-filtered with activity between 250 and 8,000 Hz analyzed as spikes. The signal was amplified and digitally converted using commercially available hardware and software (Omniplex and PlexControl, Plexon). Spikes were sorted using principal component analysis and/or evaluation of t-distribution with expectation maximization (Offline sorter, Plexon).

#### Light path visualization

A 200  $\mu$ m, 0.48 NA diameter fiber optic coupled to a 465 nm blue LED (Plexon) or devices with four, 100 x 100 x 6.45  $\mu$ m 450 nm blue  $\mu$ -ILEDs were adjusted to have the same (~280  $\mu$ W) light output. The light sources were submerged in 30  $\mu$ M fluorescein sodium salt (Sigma-Aldrich, F6377) (S15) in deionized water and the photos were taken in a dark room with an exposure of 1/1000 s and an f-number of 5.6 from ~50 cm away for all images. Each photo was cropped using Photoshop (Adobe Systems), but no other processing was used.

#### c-fos expression

C57BL/6J mice were injected with LV-Ef1 $\alpha$ -ChR2-eYFP or LV-PGK-GFP into the LC as described above. Three weeks later, animals were anesthetized, mounted on the stereotaxic instrument, and fiber optics or  $\mu$ -ILED devices were acutely implanted to target the LC. 5 mW, 3 Hz blue light stimulation was delivered for 1 hour (S16), animals were perfused immediately following, and immunohistochemistry was performed as above. Slices from the LC originated from approximately -5.45 mm caudal to bregma were mounted and imaged. For quantification, the LC was divided into three (dorsal, central, and ventral) 100 x 100  $\mu$ m compartments. TH and c-fos labeled channels were separated, the compartment mask was applied, an exclusive threshold was set and positive staining for each channel was counted in a blind-to-treatment fashion using Metamorph. The counts from each channel were then overlaid and percent TH+ cells expressing c-fos were reported.

#### Immuno-glial response in implanted tissues

C57BL/6J mice (n=16) were implanted with devices into the ventral striatum and allowed to recover for either 2 or 4 weeks before perfusion. Immunohistochemistry was performed as described.

#### Conditioned Place Preference

VTA injected (AAV5-DIO-eYFP or AAV5-DIO-ChR2-eYFP; n=4-6/group) mice were trained in an unbiased, balanced three- compartment conditioning apparatus as described (S12). Briefly, mice were pre-tested by placing individual animals in the small central compartment and allowing them to explore the entire apparatus for 30 min. Time spent in each compartment was recorded with a video camera (ZR90; Canon) and analyzed using Ethovision 8.5 (Noldus). Mice were randomly assigned to light and no-light compartments and received no light in the morning and light (20, 5 ms pulses every

minute) in the afternoon at least 4 h after the morning training on three consecutive days. CPP was assessed on day 5 by allowing the mice to roam freely in all three compartments and recording the time spent in each. Scores were calculated by subtracting the time spent in the light stimulus-paired compartment post-test minus the pre-test.

#### Real-time Place Preference

VTA injected (AAV5-DIO-eYFP or AAV5-DIO-ChR2-eYFP; n=3/group) TH-Cre mice were trained in an unbiased, balanced three-compartment conditioning apparatus as described (S12) Mice were trained in the same conditioning apparatus as described above, and the pretesting phase (day 1) was identical. However, on days 2–4, mice were still allowed to freely roam all three compartments. On these conditioning days, entry into one compartment was paired with 20, 5 ms pulses of light that would repeat every minute the animal remained in the light-paired chamber. On day 5, the post-testing was identical as the above. Scores were calculated by subtracting the time spent in the light stimulus-paired compartment each day minus the pre-test.

#### Operantly Conditioned Place Preference

VTA injected (AAV5-DIO-eYFP or AAV5-DIO-ChR2-eYFP; n=6-8/group) TH-Cre mice were prepared for nose poke training by mildly restricting daily food to four grams to stabilize body weight and facilitate behavioral responding. Mice were trained in an unbiased, balanced three-compartment Y-Maze. Each arm of the Y-Maze was 50 cm by 10 cm, a 50 cm<sup>2</sup> equilateral triangle connected all three arms (for a total area of 1550 cm<sup>2</sup>), and each arm was outfitted with a unique context (white, horizontal black stripes, or vertical black stripes). At the distal end of each of the striped arms a nose poke device (Med Associates, ENV-313M). On day 1, the headstage antenna was attached and mice were pre-tested by placing individual animals in the intersection of the three arms and allowing them to explore the entire apparatus for 30 min. During the pre-test and post-test sessions, a wall was placed to prohibit access to the nose poke apparatus and the final 15 cm of each arm. On days 2-6, the headstage antenna was attached and mice were allowed access to the entire Y-Maze for 1 hour. During these conditioning sessions a cue light was on to indicate a stimulation could be achieved nose poke and turned off for 500 ms following a poke on either device. A nose poke on the active device triggered an optical stimulation (20 pulses, 20 Hz, 5 ms pulse duration) on a fixed ratio-1 schedule, while a poke on the inactive device resulted in the cue light turning off for 500 ms. Nose pokes were recorded using a Med Associates TTL-I/O Interface connected to the Noldus Ethovision I/O Box. On day 7, the post-testing was conducted in an identical manner as the pre-test. All activity and position data was recorded using Ethovision and analyzed using Microsoft Excel and GraphPad Prism 5.0. Place preference scores were calculated by subtracting the time spent in the active nose poke-paired compartment each day minus the pre-test.

#### Open Field Test

OFT testing was performed in a sound attenuated room maintained at 23°C. Lighting was measured and stabilized at 200 lux, and performed in the afternoon between 13:00–1600 hrs. The open field was a 55 x 55 cm square enclosure and was cleaned with 70% ethanol between testing trials. For testing, VTA injected (AAV5-DIO-eYFP or AAV5-DIO-

ChR2-eYFP; n=6-8/group) TH-Cre mice were connected to cables coupled to a function generator and placed in the center of the open field and allowed to roam freely for 15 min. During the entire trial, animals received 20, 5 ms pulses of photostimulation. Movements were video- recorded and analyzed using Ethovision. The center was defined as a square comprised of 50% the total area of the OFT. Time in the center expressed as percentages total time was the primary measure of anxiety-like behaviors.

#### Elevated Zero Maze

EZM testing was performed in a sound attenuated room maintained at 23°C. Lighting was 200 lux, and performed in the afternoon between 13:00–1600 hrs. The EZM (Harvard Apparatus) was made of grey plastic (Dimensions: 200 cm in circumference comprised of four 50 cm sections: two opened, two closed. The maze was elevated 50 cm above the floor and had a path width of 4 cm with a 0.5 cm lip on each open section) and was cleaned with 70% ethanol between trials. For testing, VTA injected (AAV5-DIO-eYFP or AAV5-DIO-ChR2-eYFP; n=6-9/group) TH-Cre mice were connected to the headstage antenna and placed at the threshold of a closed section facing the open section and allowed to roam freely for 9 min. For the first and the final 3 minutes of each trial there was no photostimulation. For minutes 4-6, animals received 5 Hz, 5 ms width stimulation. Movements were video- recorded and analyzed using Ethovision (Noldus). Open section times expressed as percentages total time the primary measures of anxiety-like behaviors.

#### Data Analysis/Statistics

Data are expressed as means  $\pm$  SEM. Data were normally distributed, and differences between groups were determined using independent t-tests or one-way ANOVA, or two-way ANOVAs followed by post hoc Bonferroni comparisons if the main effect was significant at  $p < 0.05$ . Statistical analyses were conducted using Prism 5.0 (GraphPad).

#### Genotyping of mouse lines

DNA was isolated from tail tissue obtained from weanling mice (21-28 days of age), and PCR screening was performed using the following primers: Cre recombinase (forward: 5'- GCA TTA CCG GTC GAT GCA ACG AGT GAT GAG-3' and reverse: 5'- GAG TGA ACG AAC CTG GTC GAA ATC AGT GCG-3') yielding a 400-bp PCR product in Cre positive animals. Fatty acid-binding protein intestinal primers (forward: 5'- TGG ACA GGA CTG GAC CTC TGC TTT CCT AGA-3' and reverse: 5'- TAG AGC TTT GCC ACA TCA CAG GTC ATT CAG-3') were used as positive controls and yield a 200-bp PCR product.

## Supplementary References

- S1. F.P. Incropera, D.P. Dewitt, T.L. Bergman, A.S. Lavine. Fundamentals of heat and mass transfer (Eds: J. Hayton), John Wiley & Sons, New York 2006.
- S2. B. Solano, S. Rolt and D. Wood, Thermal and mechanical analysis of an SU8 polymeric actuator using infrared thermography. *Proc. IMechE 222 Part C: J. Mech Eng Sci*, **222**, 73-86 (2007).
- S3. C.G. Mattsson *et al.*, Development of an infrared thermopile detector with a thin self-supporting SU-8 membrane, *IEEE SENSORS 2007 Conference*, 836-839 (2007).
- S4. A.K. van der Vegt en L. E. Govaert. Polymeren, ISBN 2005.
- S5. S.A. Campbell, The Science and Engineering of Microelectronic Fabrication. Oxford University Press, New York (2001).
- S6. T.-I. Kim et al., High efficiency, microscale GaN LEDs and their thermal properties on unusually substrates. *Small* 8, 1643-1649 (2012)
- S7. A. Modafe *et al.*, Embedded benzocyclobutene in silicon: An integrated fabrication process for electrical and thermal isolation in MEMS. *Microelectron. Eng.* **82**, 154-167 (2005).
- S8. M.M. Elwassif, Q. Kong, M. Vazquez, M. Bikson, Bio-heat transfer model of deep brain stimulation-induced temperature changes. *J. Neural Eng.* 3, 306 (2006).
- S9. B. Esler, T. Lyons, S. Turovets, D. Tucker, *Journal of Physics: Conference Series* 224, 012007 (2010).
- S10. K. Ito, K. Furuya, Y. Okano, L. Hamada, *Electronics and Communications in Japan (Part I: Communications)* 84, 67 (2001).
- S11. D.R. Sparta *et al.*, Construction of implantable optical fibers for long-term optogenetic manipulation of neural circuits. *Nat. Met.*, **7**, 12-23 (2012).
- S12. M.R. Bruchas *et al.*, Selective p38a MAPK Deletion in Serotonergic Neurons Produces Stress Resilience in Models of Depression and Addiction. *Neuron* **71**, 498–511 (2011).
- S13. N.R. Zhang *et al.*, Serine 363 is required for NOPR desensitization, internalization, and arrestin signaling. *JBC*, Epub ahead of print, doi:10.1074/jbc.M112.40569 (2012).
- S14. R.D. Airan, K.R. Thompson, L.E. Fenno, H. Bernstein, K. Deisseroth, Temporally precise in vivo control of intracellular signalling. *Nature* 458, 1025-1029 (2009).

- S15. K.M. Tye et al., Amygdala circuitry mediating reversible and bidirectional control of anxiety. *Nature* 471, 358-362 (2011).
- S16. M.E. Carter et al., Tuning arousal with optogenetic modulation of locus coeruleus neurons. *Nat. Neuro.* 13, 1526-1533 (2011).
- S17. K.R. Tan *et al.*, GABA neurons of the VTA drive conditioned place aversion. *Neuron* **73**, 1173–1183 (2012).
- S18. A.M. Stamatakis , G.D. Stuber. Activation of lateral habenula inputs to the ventral midbrain promotes behavioral avoidance. *Nat. Neuro.* **12**, 1105-1107 (2012).
- S19. S. Lammel, B.K. Lim, C. Ran, K.W. Huang, M.J. Betley, K.M. Tye, K. Deisseroth, R. C. Malenka. Input specific control of reward and aversion in the ventral tegmental area. *Nature.* **491**, 212-217 (2012).

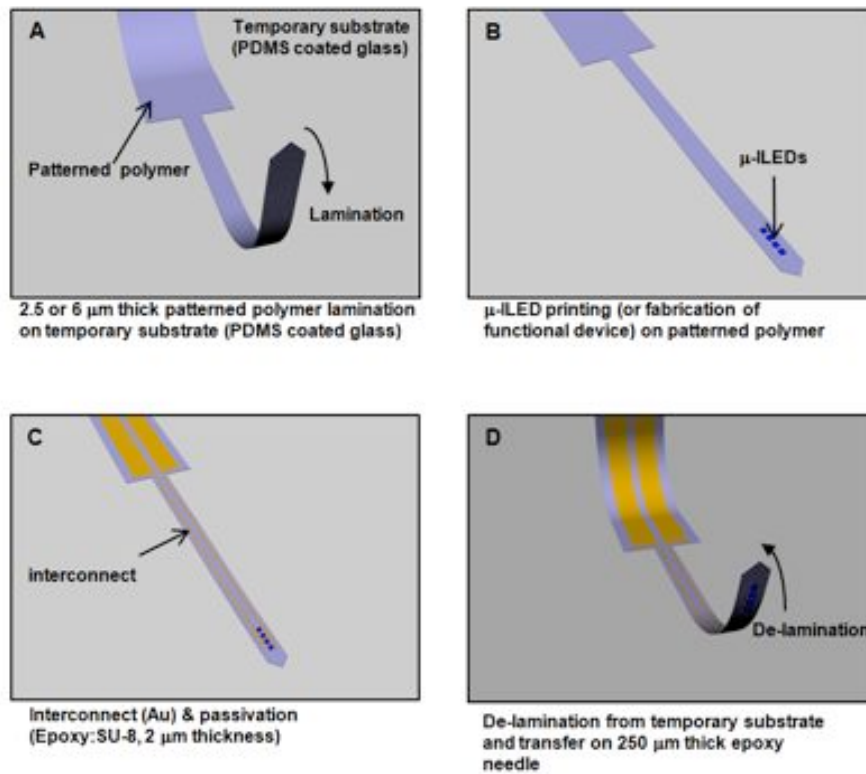

**Figure S1**

Schematic illustration of steps for fabrication **(A)** thin (2.5 or 6.0  $\mu\text{m}$  thick) microneedle-shaped polymeric template laminated on a PDMS coated substrate, **(B)**  $\mu\text{-LEDs}$  integrated by transfer printing, **(C)** patterned passivation layers and interconnects, and **(D)** removal of the device from the PDMS coated substrate and transfer printing onto a releasable, injection microneedle substrate.

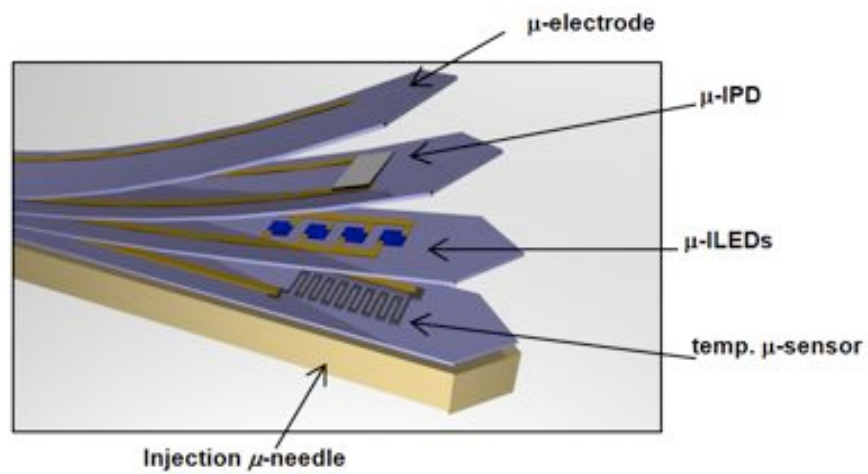

**Figure S2**

Schematic illustration of a printed multifunctional  $\mu$ -ILED system.



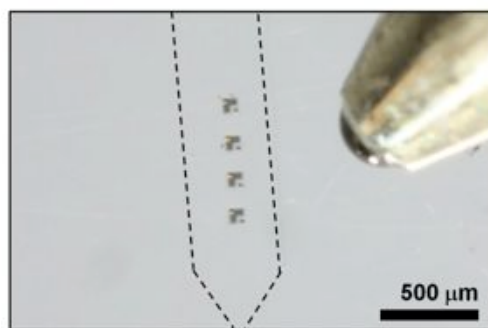

**Figure S3**

Photograph of four printed  $\mu$ -ILEDs next to the tip of a ballpoint pen (right), to set the scale. Each  $\mu$ -ILED has lateral dimensions of  $100 \times 100 \mu\text{m}^2$ , with two  $25 \times 25 \mu\text{m}^2$  metal pads for contacts and an L-shape current spreader.

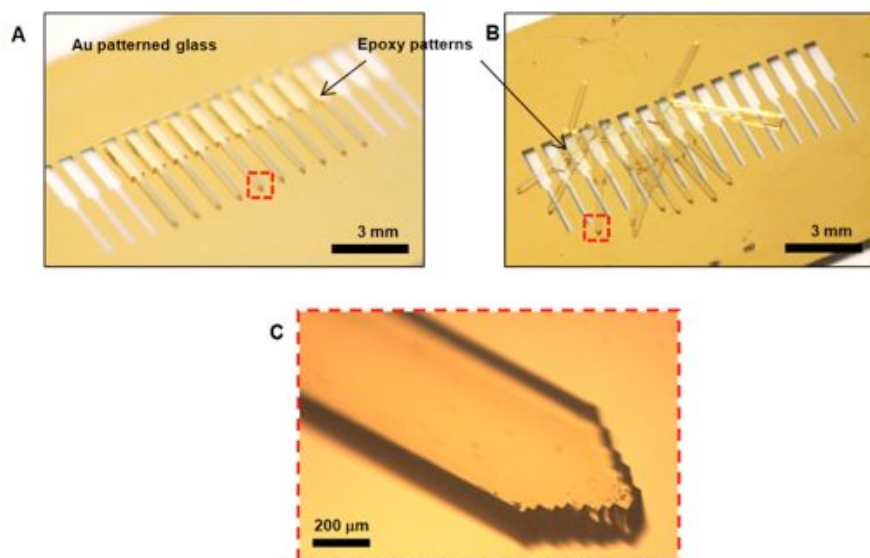

**Figure S4**

Images of injection microneedles defined photolithographically using a UV-curable epoxy (250 μm thick, SU-8 100). **(A)** Photolithographic patterning of epoxy on a pre-patterned glass substrate **(B)** microneedles delaminated by mechanical force from the glass substrate. **(C)** Tilted optical microscopic image of a single microneedle.

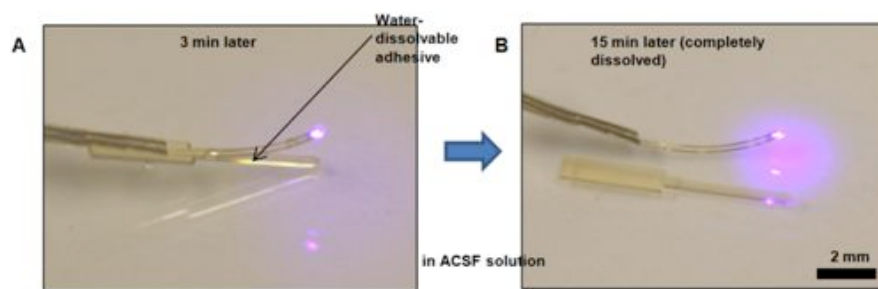

**Figure S5**

Demonstration of silk as a water soluble, bio-resorbable, releasable adhesive for injection microneedles. **(A)** Image of a device at the initial stages of silk dissolution, after 3 min and **(B)** after full dissolution and mechanical separation, after 15 min.

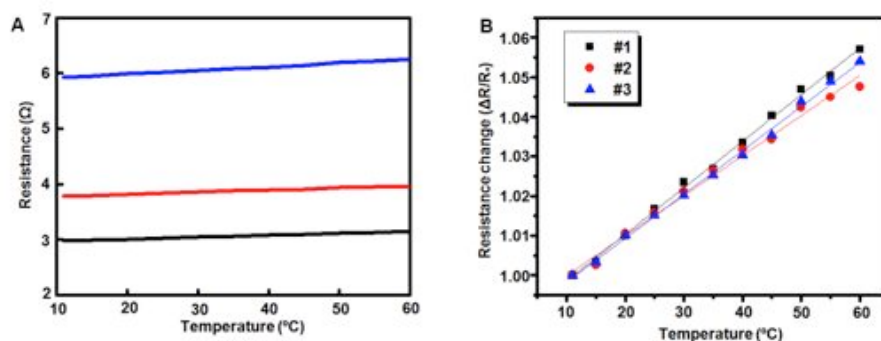

**Figure S6**

Relationship between temperature and resistance of temperature sensors. **(A)** Change in resistance with temperature. **(B)** Fractional change in resistance as a function of temperature, for three different devices.

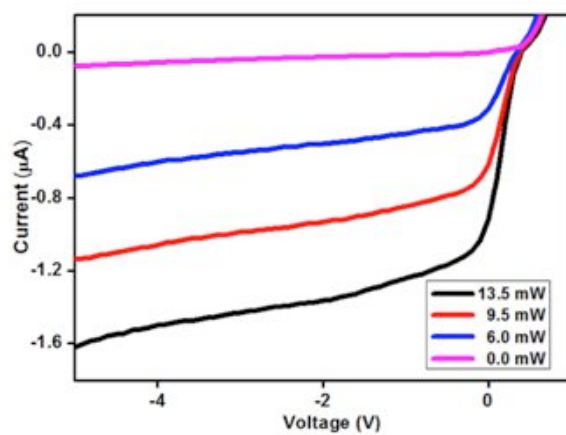

**Figure S7**

Current-voltage (I-V) characteristics of a  $\mu$ -IPD exposed to different light intensities generated by operation of four  $\mu$ -ILEDs. Electrical DC input powers into the  $\mu$ -ILEDs were 0, 6.0, 9.5, 13.5 mW.

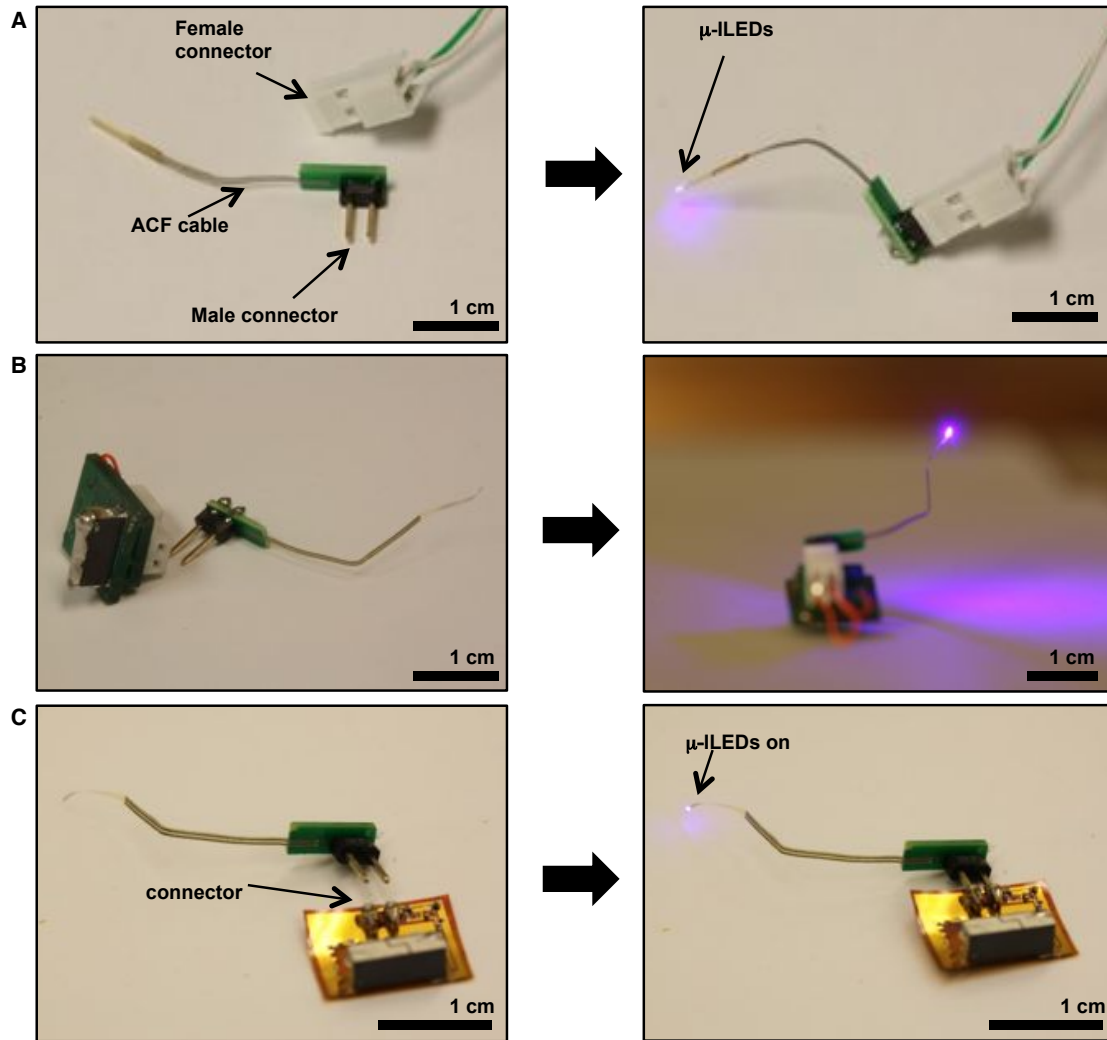

**Figure S8**

Images of the plug-in geometry of the connection between power supplies and penetrating  $\mu$ -ILED systems, for the case of a wired supply (A) and RF wireless units (B and C).

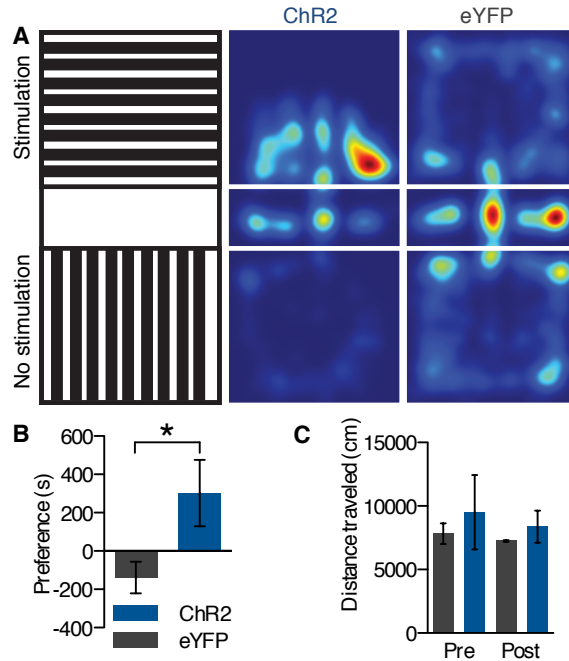

### Figure S9

$\mu$ -ILED devices drive a conditioned place preference using standard TTL signals. To demonstrate wired functionality, we selectively targeted ChR2(H134)-eYFP to VTA-DA neurons (Fig. 4A) and tested that phasic activation (20, 5 ms pulses every minute) of cells with a  $\mu$ -ILED device is sufficient to drive robust place preference behavior without a change in locomotor activity. Animals were conditioned over three days for 30 minutes.  $\mu$ -ILED devices were powered and controlled using standard function generator (Tektronix, AFG3022B or AMPI, Master-9). (A) Left, Diagram of three-chambered conditioned place preference apparatus. Right, representative heat maps of activity during the post-test, hotter colors represent longer duration at every location in the apparatus. (B) Place preference scores, calculated as post-test minus pre-test on the light stimulation-paired side (n = 4-6/group; \*p<0.05 t test compared to AAV5-DIO-eYFP controls). (C) Total activity during the pre- and post-tests shows no difference between the two groups. All bars represent means  $\pm$  SEM.

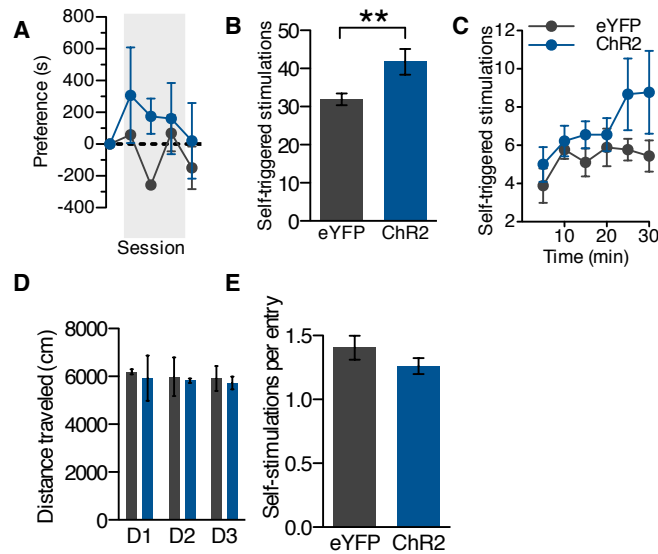

### Figure S10

Real-time assessment of reward seeking or aversion is possible by pairing an animal's behavioral response with self-triggered stimulation or inhibition (*S17-S19*). Real-time conditioning, animals allowed free access to the apparatus from fig. S18A learn to self-trigger stimulations when 10, 5 ms pulses at 20 Hz light is delivered contingent on entry into the paired chamber. **(A)** Animals did not express either a real-time or conditioned place preference under this experimental design. **(B)** AAV5-DIO-ChR2 mice, however, did have increased numbers of passive, entry-triggered self-stimulations. **(C)** Passive self-stimulation is learned over the course of each trial. **(D)** Importantly, this difference is not due to a change in activity between the two groups ( $n = 3/\text{group}$ ,  $**p < 0.01$  t test compared to AAV5-DIO-eYFP controls). **(E)** Animals could receive subsequent stimulations if they remained in the stimulus-paired chamber for 60 seconds. ChR2 mice did not learn to remain in the chamber for these subsequent stimulations.



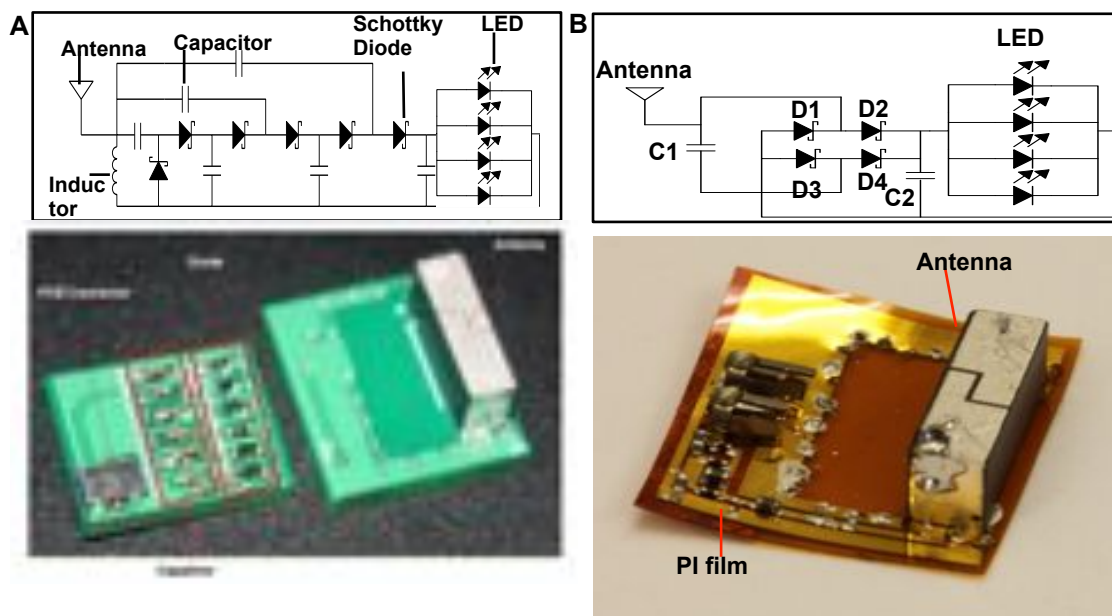

**Figure S11**

Circuit diagrams for each RF powering scavenger and pictures of RF powering scavenger (left) and RF antenna (right), in a miniaturized PCB layout (**A**) and on polyimide film (**B**). The RF power scavenger contains a RF antenna that works at 910 MHz, an impedance matching inductor, a voltage multiplexer with cascaded combination of Schottky diodes and capacitors, and blue LEDs. The circuit of the RF power scavenger for (**A**) is on two stacked PCB boards that are connected with each other by a PCB connector. For RF power scavenger for (**B**), Au pre-patterned PI film supports all of components connected by silver epoxy.

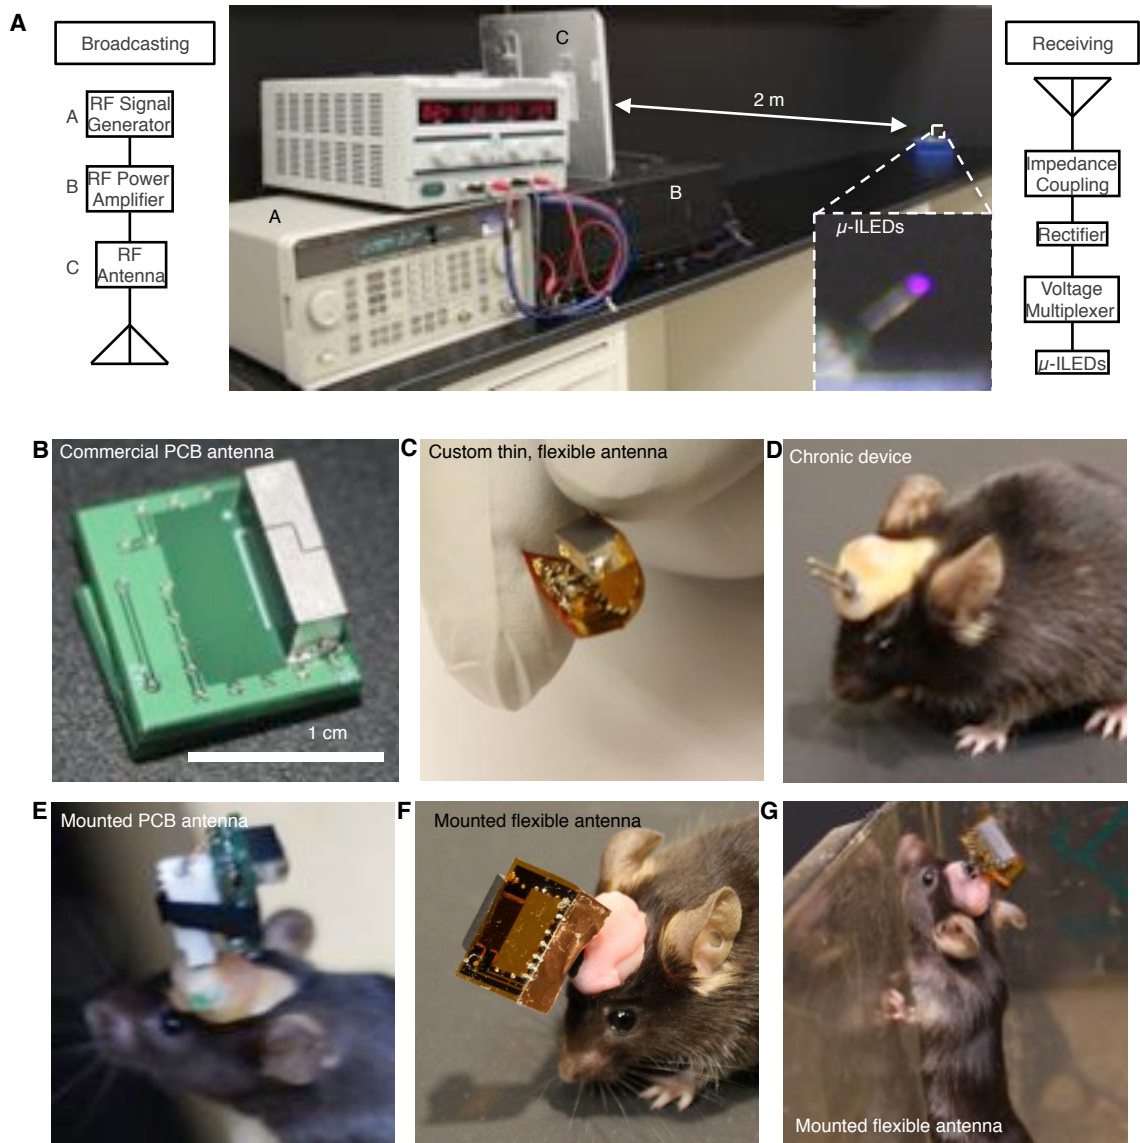

**Figure S12**

Key components for wireless operation using RF power delivery. **(A)** Photo and diagram explaining the components of the system and demonstrating wireless power. Headstage antennas on PCB board **(B)** and on bent PI **(C)**. **(D)** A mouse with a chronically implanted device. The nature of the interconnect allows for temporary coupling to either form of headstage antenna or a wired power source. **(E,F,G)** Mice with acutely mounted headstage antennas.

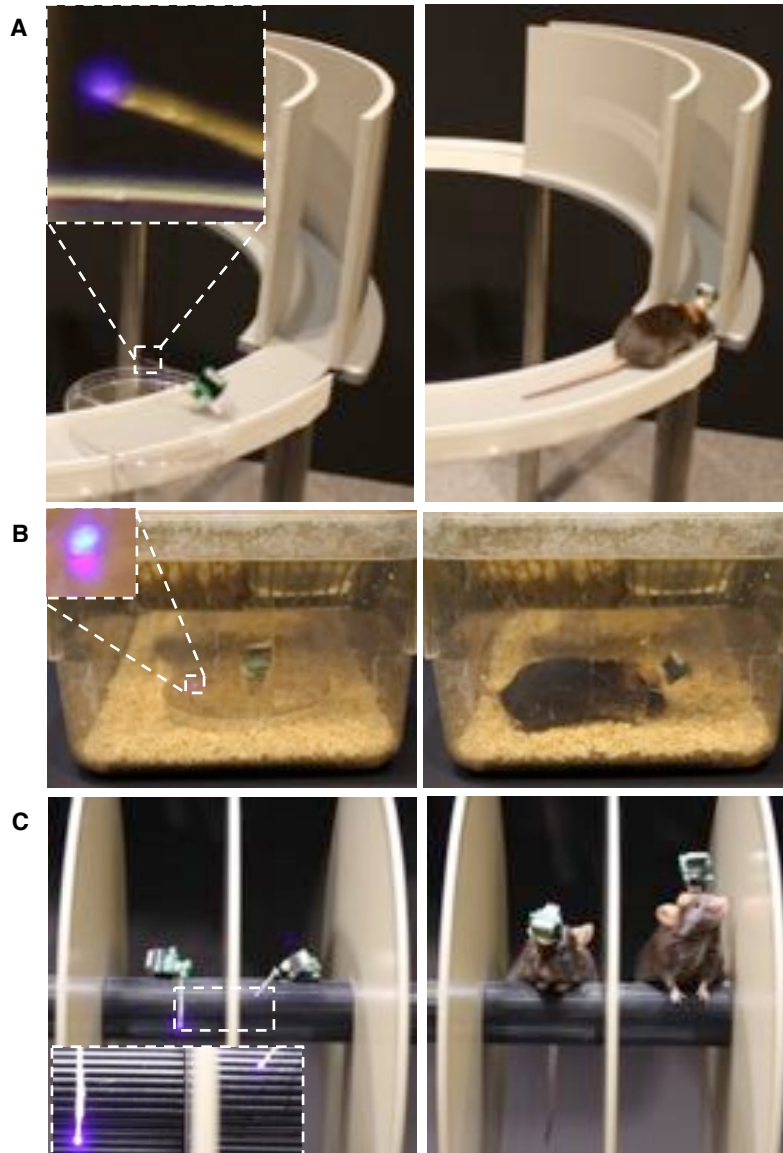

**Figure S13**

Demonstration of wireless capabilities. For all panels the same environment is shown with wireless lit  $\mu$ -ILEDs (left) and wirelessly stimulated mice (right). (A) Wireless mice can explore circular environments with no need for commutators or adaptations to the behavioral apparatus. (B) RF modulation can be used to power devices through covered arenas as seen here with a mouse in a traditional homecage environment. (C) Multiple wireless devices can be controlled using a single antenna. Here, two implanted mice are receiving identical optical stimulation simultaneously on a standard rotarod- a rotating wheel that provides numerous barriers for use with tethered animals.

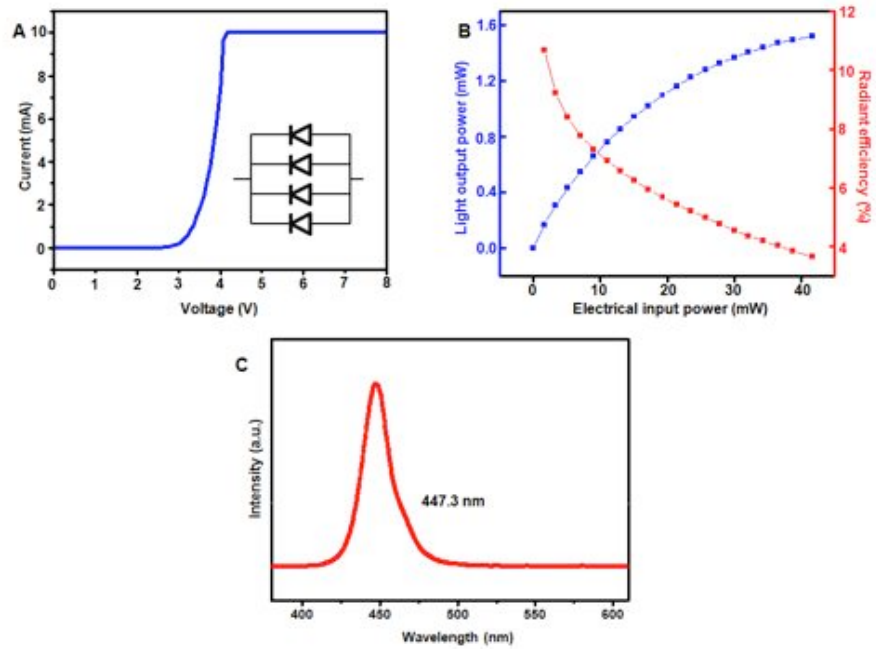

**Figure S14**

Electrical and optical properties of an array of four  $\mu$ -ILEDs connected in parallel. **(A)** Current-Voltage (I-V) characteristics, **(B)** light output power and radiant efficiency as a function of electrical input power, and **(C)** light emission intensity as a function of wavelength.

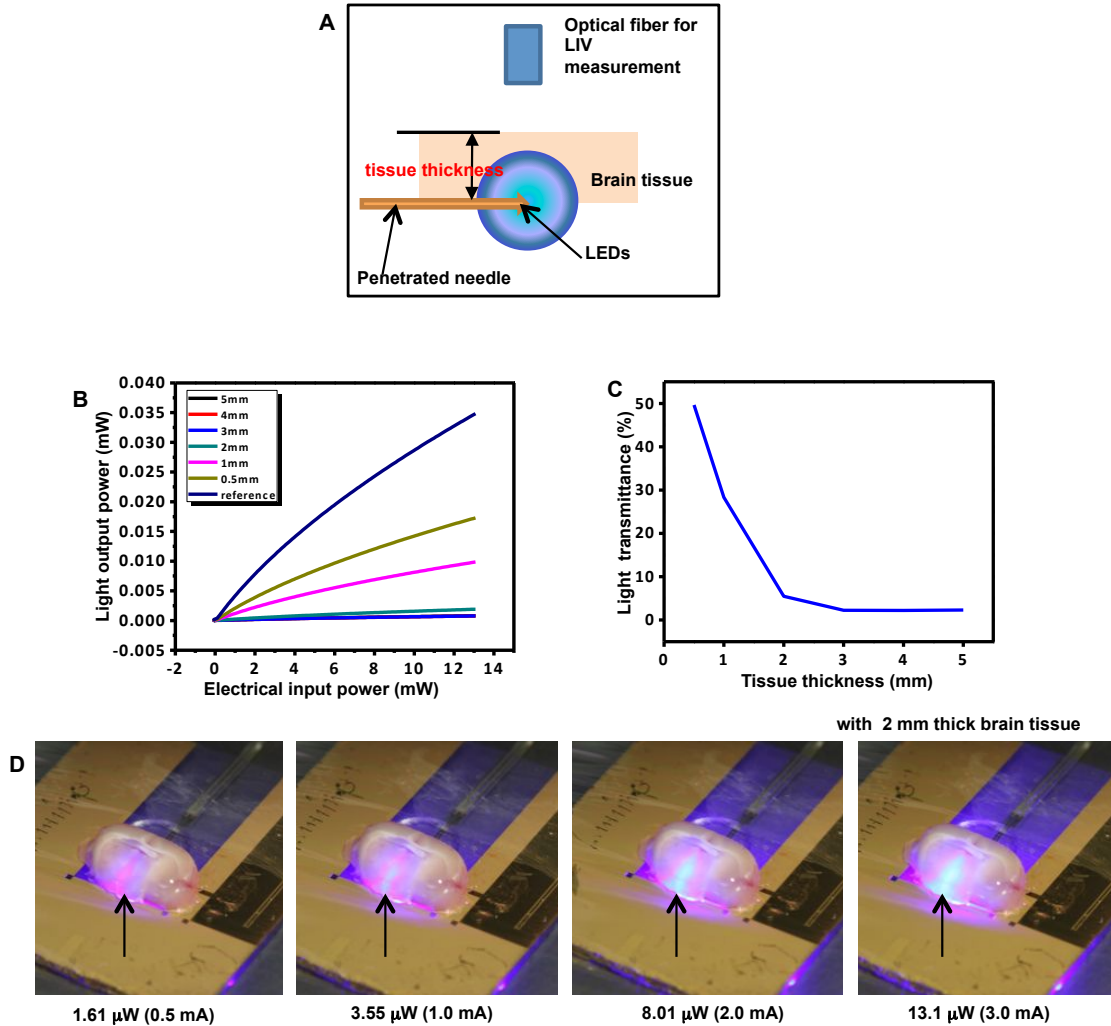

**Figure S15**

Information related to tests of light penetration depth. **(A)** Schematic illustration of the experimental scheme, **(B)** light output-current and voltage (LIV) results collected using slabs of brain tissue with various thicknesses (0.5, 1, 2, 3, 4, 5 mm) and **(C)** their light transmission through the thickness of the tissue. **(D)** Light extraction through 2 mm thick slabs of brain tissue at various applied powers.

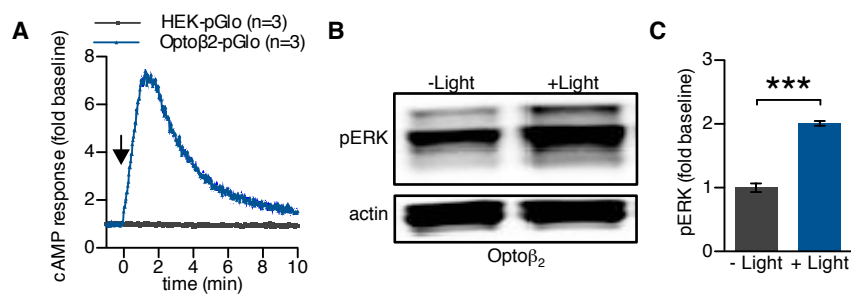

**Figure S16**

$\mu$ -ILED-induced activation of cAMP and ERK phosphorylation in Opto $\beta_2$  expressing cells. **(A)** Opto $\beta_2$  cells co-expressing pGlo show a rapid and transient increase in cAMP following light (450 nm, 5 sec, 0.5 W/cm<sup>2</sup> pulse) stimulation (n=3). HEK293 cells expressing pGlo show no response to the same light stimulation (n=3). Data are expressed as mean  $\pm$  sem. **(B)**. Representative pERK and actin Western Blots for Opto $\beta_2$  and HEK293 cells following light (450 nm, 1 min, 0.5 W/cm<sup>2</sup> pulse) stimulation (n=3). **(C)**. Quantitation of pERK normalized to actin in light stimulated Opto $\beta_2$  and HEK293 cells. (\*p<0.05, unpaired, two-tailed t-test).

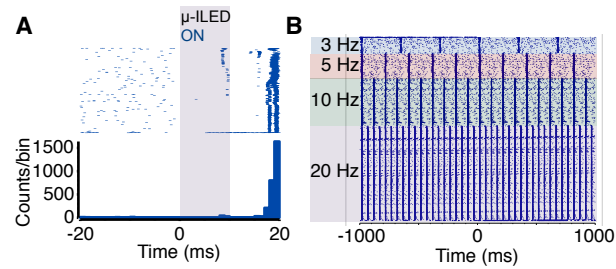

**Figure S17**

μ-ILED-induced modulation of *in vivo* neuronal activity in the VTA via ChR2(H134)-eYFP expressing neurons. **(A)** Representative peri-light raster plot and histogram demonstrating increased cell firing within 20 ms of onset of a 450 nm, 0.5 W/cm<sup>2</sup> light pulse. **(B)** Raster plot showing activity from the same neuron (A) time locking with various frequencies of light delivery. Each light pulse is centered at 0 ms, the effects of prior and subsequent pulses are apparent in each line of the 2000 ms raster plot.

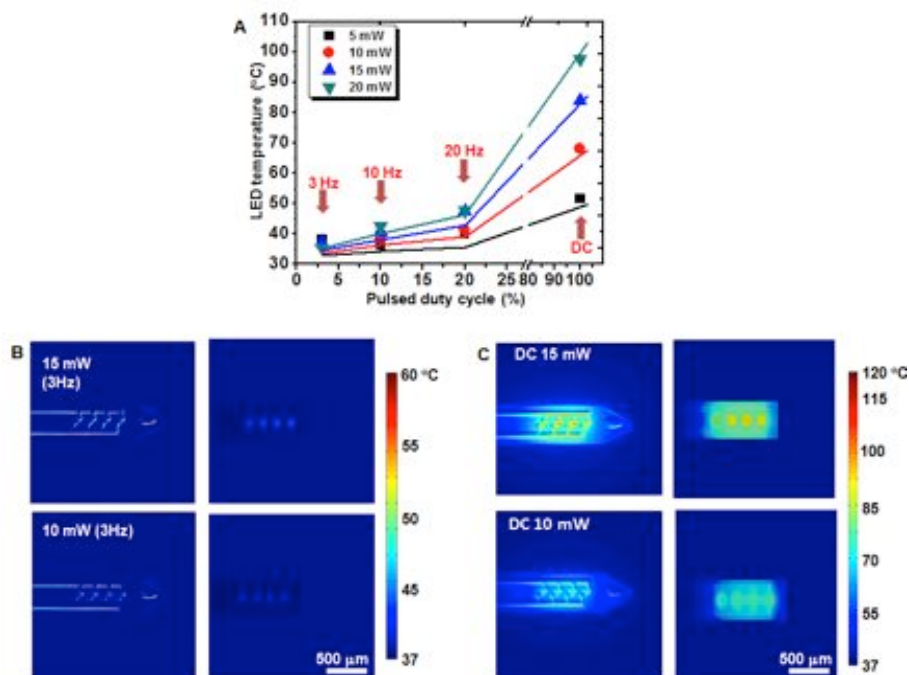

**Figure S18**

Surface temperature of  $\mu$ -LEDs on an injection microneedle, during operation at various power levels in open air. **(A)** Measured (dots) and calculated (lines) temperatures of  $\mu$ -LEDs at various pulse duty cycles and at DC power levels. All calculated temperatures (lines) are obtained by time-average results at 37 °C background temperature. The duration time (width) for all pulsed cases is 10 msec. **(B)** Measured (left) and calculated (right) temperatures at 15 and 10 mW applied power. The measured (calculated) temperatures are 37.44 (39.31) and 36.15 (38.54) °C, respectively, with a 3 Hz pulse. **(C)** Measured (left) and calculated (right) temperature at 15 and 10 mW DC applied power. The measured temperatures (calculated) are 84.01 (86.95) and 86.31 (70.30) °C, respectively, with a 3 Hz pulse.



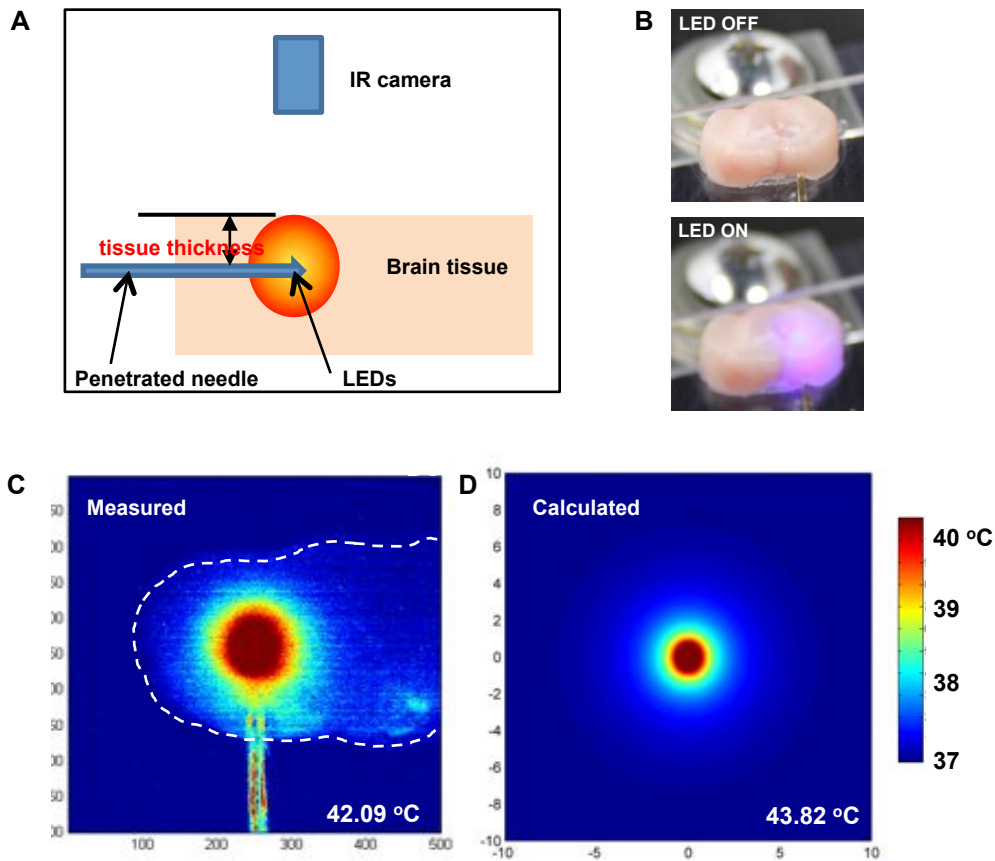

**Figure S19**

Thermal imaging with a calibrated IR camera. **(A)** Schematic illustration and **(B)** pictures of the IR camera stage and  $\mu$ -ILED devices injected in brain tissue. **(C)** Measured and **(D)** calculated tissue temperature with  $\mu$ -ILEDs injected into a 0.3 mm thick slab of tissue, evaluated at the surface for the case of 10 mW DC input power. Measured and calculated temperatures are 42.09 and 43.82 °C, respectively.

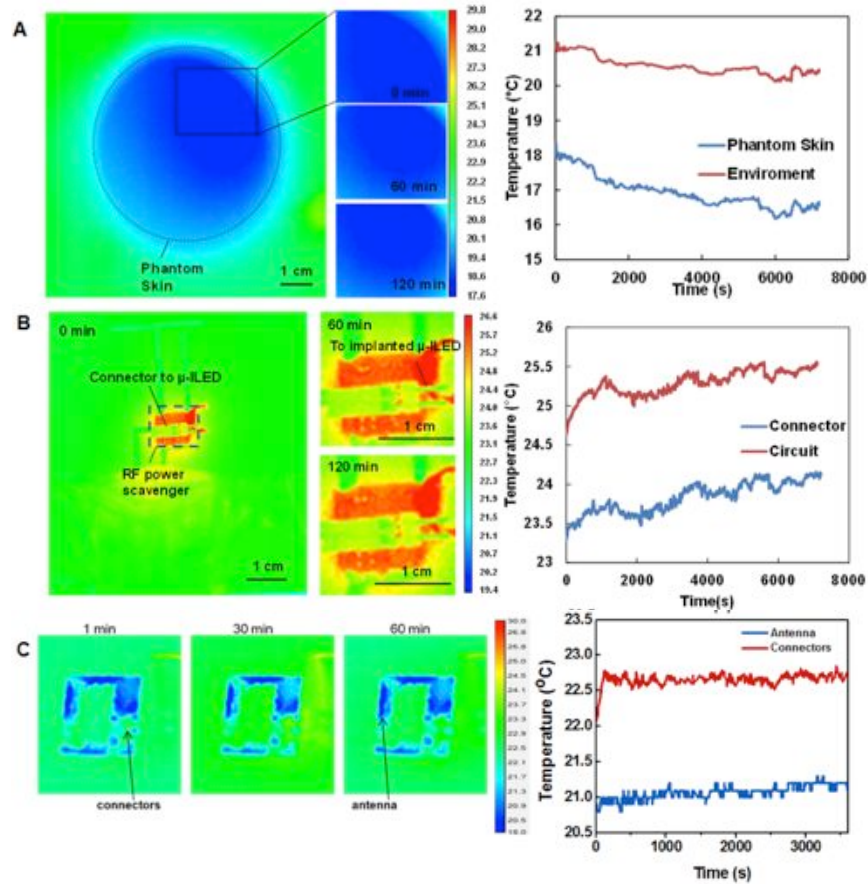

**Figure S20**

IR images (left) and extracted average temperatures (right) of a phantom skin sample and the surrounding environment during prolonged exposure to RF radiation, starting at time=0 s. The results indicate no observable effects of heating due to RF. The temperature variations in the phantom skin are small, and mostly due to variations in the environment, without any observable effect, even under constant RF power (**B**) IR images (left) of a RF power scavenger circuit during exposure to constant RF radiation for various times. The images show changes in temperature when RF power is applied, and the  $\mu$ -ILEDs are turned on, for 0 (left), 60 (right, top), and 120 (right, bottom) min. Spatially averaged changes in temperature (right) of the RF power scavenger circuit and connector during prolonged exposure to constant RF radiation, starting at time=0 s. The temperature change is less than 0.5°C during this 2 hr period. (**C**) IR images (left) of a thin, lightweight flexible RF power scavenger circuit during exposure to pulsed (10 Hz) RF radiation for various times: 1 (left), 30 (middle), and 60 (right) min. There is no temperature change (right) in the thin, lightweight flexible RF power scavengers (near the antenna and the connectors) during prolonged exposure to pulsed RF radiation at 10 Hz.

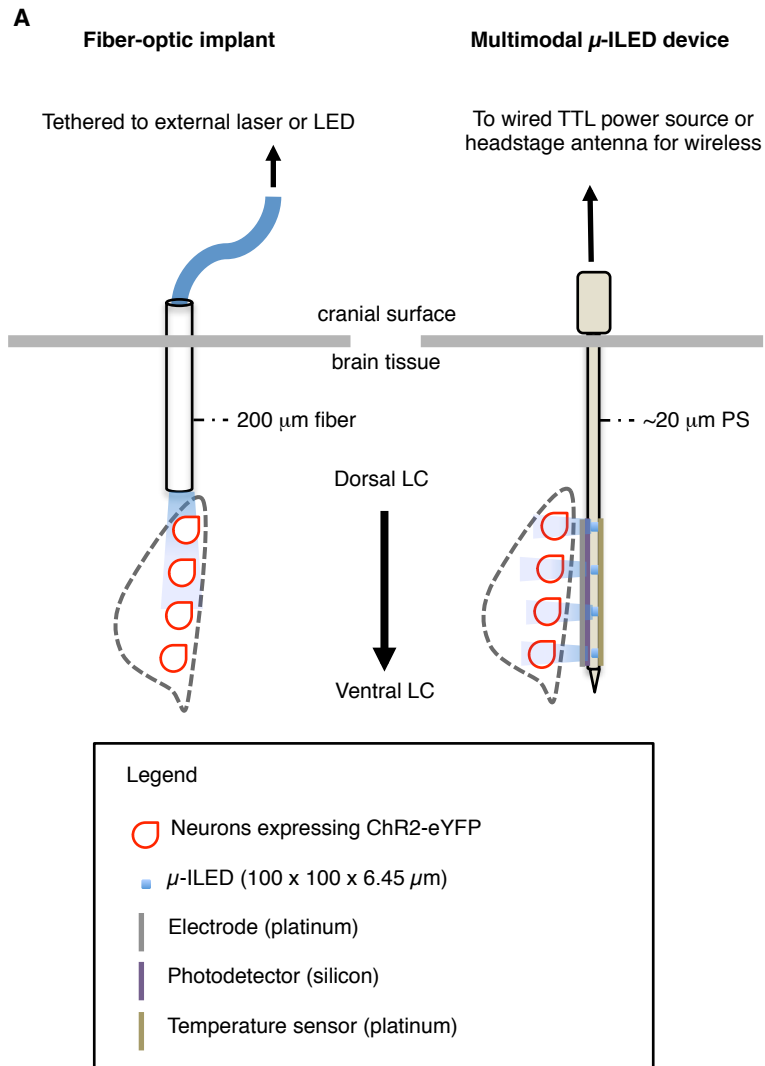

**Figure S21**

Cartoon depicting the experimental strategy used in Fig. 3B & 3C. μ-ILED devices allow for unique spatial targeting of brain structures (here the locus coeruleus) to provide consistent illumination along the entire dorsal-ventral plane of the structure.

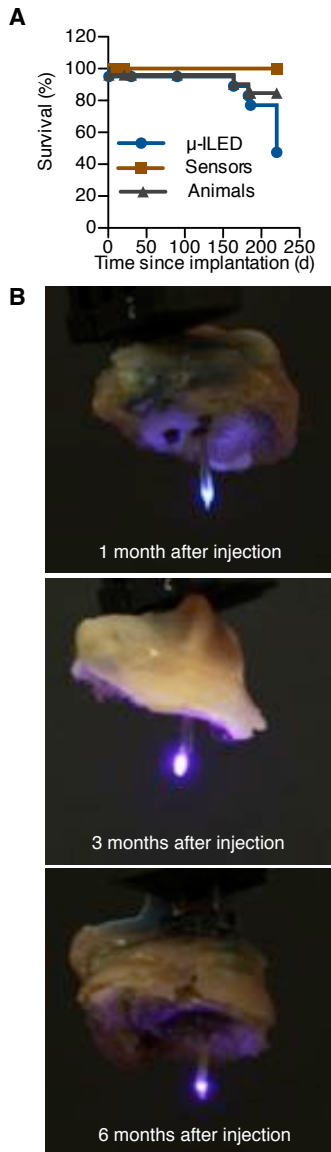

### Figure S22

The durability of the devices and the constituent component following chronic implantation. **(A)** Survival curve showing viability of  $\mu$ -ILEDs, fully passivated sensors (temperature and  $\mu$ -IPD), and animals following device injection.  $\mu$ -ILEDs were considered viable if the all  $\mu$ -ILEDs in each array were still emitting sufficient light to activated ChR2. Sensors were considered viable if performance was within 1% of original performance. Components performed reliably within the two-three week timespan of a normal behavioral experiment and often well beyond that range. Detailed information on each point of attrition or censorship is available in Table S1. **(B)** The  $\mu$ -ILED devices are robust and capable of functioning properly months after implantation. Working devices one (top), three (center), and six (bottom) months after chronic implantation into freely moving mice.

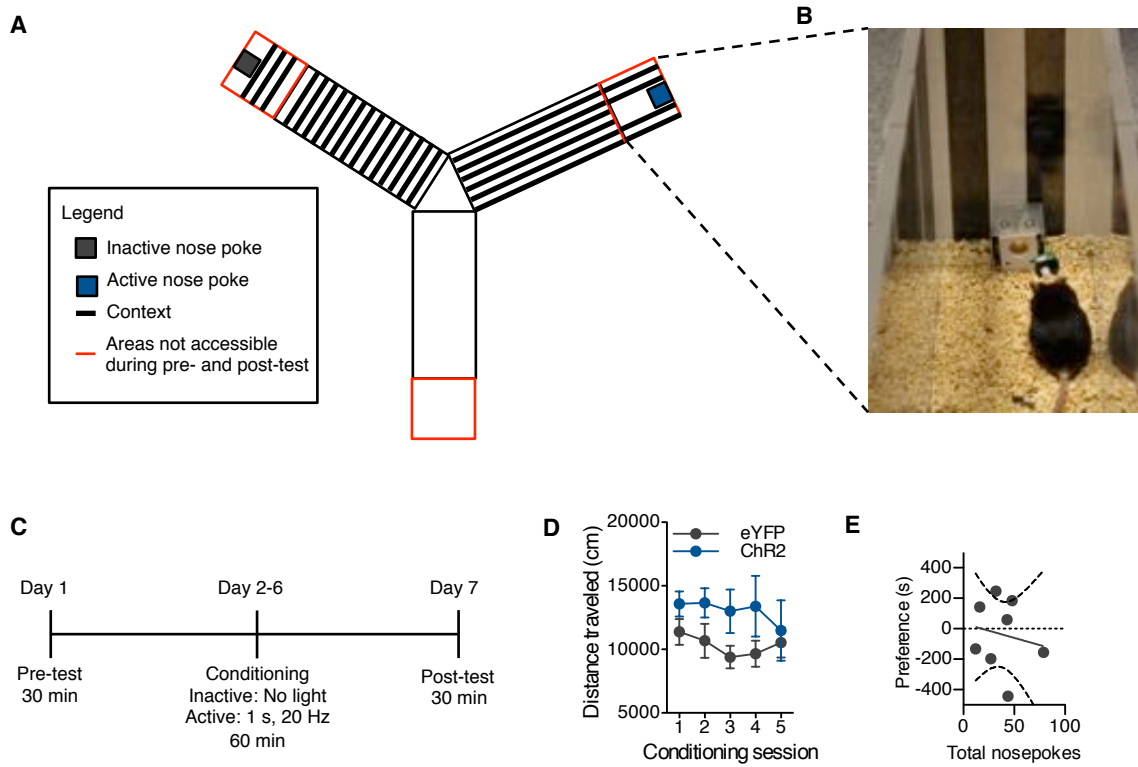

### Figure S23

Wireless  $\mu$ -ILED devices drive an operantly conditioned place preference. **(A)** Cartoon and **(B)** photo of Y-Maze with contexts and nose poke devices, red zones were not accessible during pre/post-tests. **(C)** Timeline of experimental approach. **(D)** Total activity during the conditioning shows increase in total ambulation of the ChR2 mice during the first four days of training. **(E)** Scatter plot demonstrating no correlation ( $r=-0.1707$ ,  $p=0.6861$ ) between post-test preference and total number of active nose pokes during training in the AAV-DIO-eYFP injected controls.

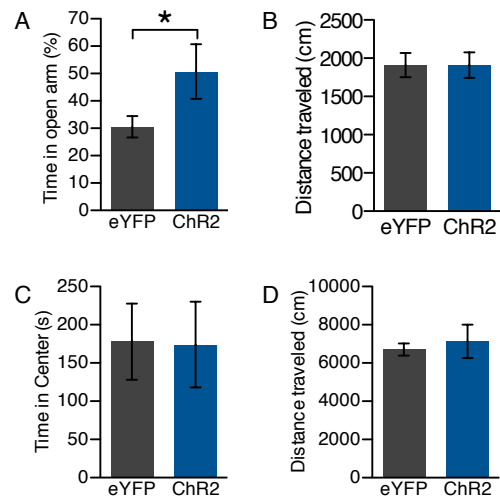

### Figure S24

Tonic, not phasic, activation of VTA-DA neurons induces anxiolytic-like behavior. (A) 5 Hz activation of VTA-DA neurons induces an anxiolytic-like behavioral response in an elevated zero maze independent of (B) locomotor effects (n=6-9; \*p<0.05 t test compared to AAV5-DIO-eYFP controls). (C) Phasic (20, 5 ms pulses of 20 Hz light every minute) stimulation does not influence anxiety-like behavior or (D) locomotor activity in the open field test (n=6-8/group).

**Table S1**

Detailed information on the attrition and censoring of devices from Figure S22A. The last working day after implantation was recorded as 0 if the damage occurred prior to or during implantation.

| <b>Device ID</b> | <b>Reason for attrition/censor</b>         | <b>Last working day after implantation</b> |
|------------------|--------------------------------------------|--------------------------------------------|
| <b>S1</b>        | Testing period ended, sensor working       | 21                                         |
| <b>S2</b>        | Testing period ended, sensor working       | 21                                         |
| <b>S3</b>        | Testing period ended, sensor working       | 21                                         |
| <b>S4</b>        | Testing period ended, sensor working       | 21                                         |
| <b>S5</b>        | Testing period ended, sensor working       | 21                                         |
| <b>S6</b>        | Testing period ended, sensor working       | 220                                        |
| <b>S7</b>        | Interconnect failure                       | 0                                          |
| <b>S8</b>        | Testing period ended, sensor working       | 7                                          |
| <b>L1</b>        | Structural damage during implantation      | 0                                          |
| <b>L2</b>        | Testing period ended, $\mu$ -ILEDs working | 220                                        |
| <b>L3</b>        | Animal died, device damaged on removal     | 183                                        |
| <b>L4</b>        | Testing period ended, $\mu$ -ILEDs working | 220                                        |
| <b>L5</b>        | Testing period ended, $\mu$ -ILEDs working | 220                                        |
| <b>L6</b>        | Testing period ended, $\mu$ -ILEDs working | 220                                        |
| <b>L7</b>        | Testing period ended, $\mu$ -ILEDs working | 220                                        |
| <b>L8</b>        | Testing period ended, $\mu$ -ILEDs working | 220                                        |
| <b>L9</b>        | Testing period ended, $\mu$ -ILEDs working | 220                                        |
| <b>L10</b>       | Testing period ended, $\mu$ -ILEDs working | 220                                        |
| <b>L11</b>       | Testing period ended, $\mu$ -ILEDs working | 220                                        |
| <b>L12</b>       | Testing period ended, $\mu$ -ILEDs working | 30                                         |
| <b>L13</b>       | Animal died, device damaged on removal     | 164                                        |
| <b>L14</b>       | One or more $\mu$ -ILED failure            | 186                                        |
| <b>L15</b>       | Testing period ended, $\mu$ -ILEDs working | 90                                         |
| <b>L16</b>       | Testing period ended, $\mu$ -ILEDs working | 90                                         |
| <b>L17</b>       | One or more $\mu$ -ILED failure            | 220                                        |
| <b>L18</b>       | One or more $\mu$ -ILED failure            | 220                                        |
| <b>L19</b>       | One or more $\mu$ -ILED failure            | 220                                        |
| <b>L20</b>       | One or more $\mu$ -ILED failure            | 220                                        |

**Movie S1**

A movie clip that illustrates the procedure for injecting ultrathin, mechanically compliant optoelectronics into the ventral striatum of an intact, living mouse brain. The movie specifically highlights the injection on the rigid microneedle and removal of the microneedle following dissolution of the silk adhesive. Total elapsed time between video clips is ~15 minutes.
